# Supplementary material
Source: PubMed Central journal article supplement (PMC5750087)

**Figure 1 - S1**

**A**

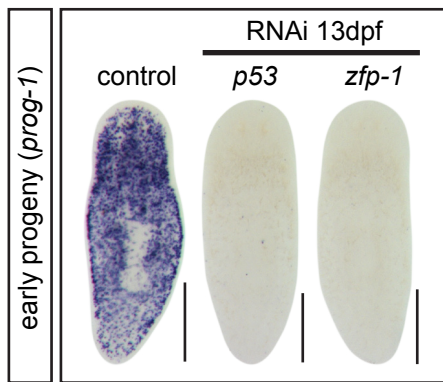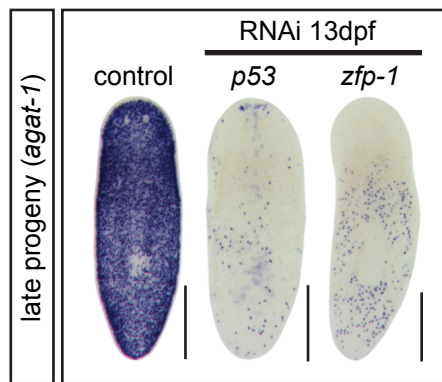

**B**

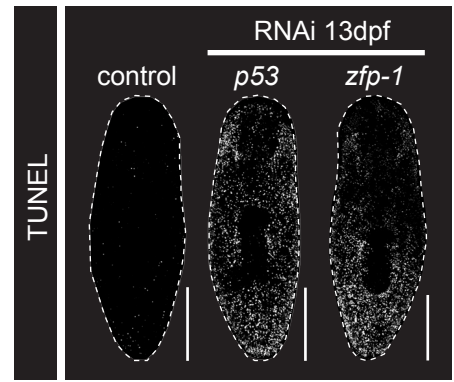

**C**

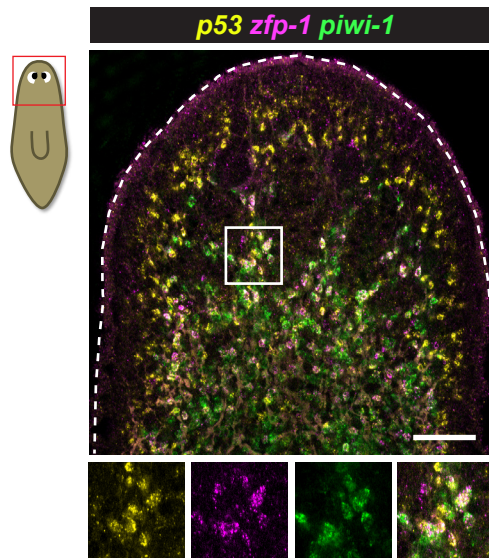

**D**

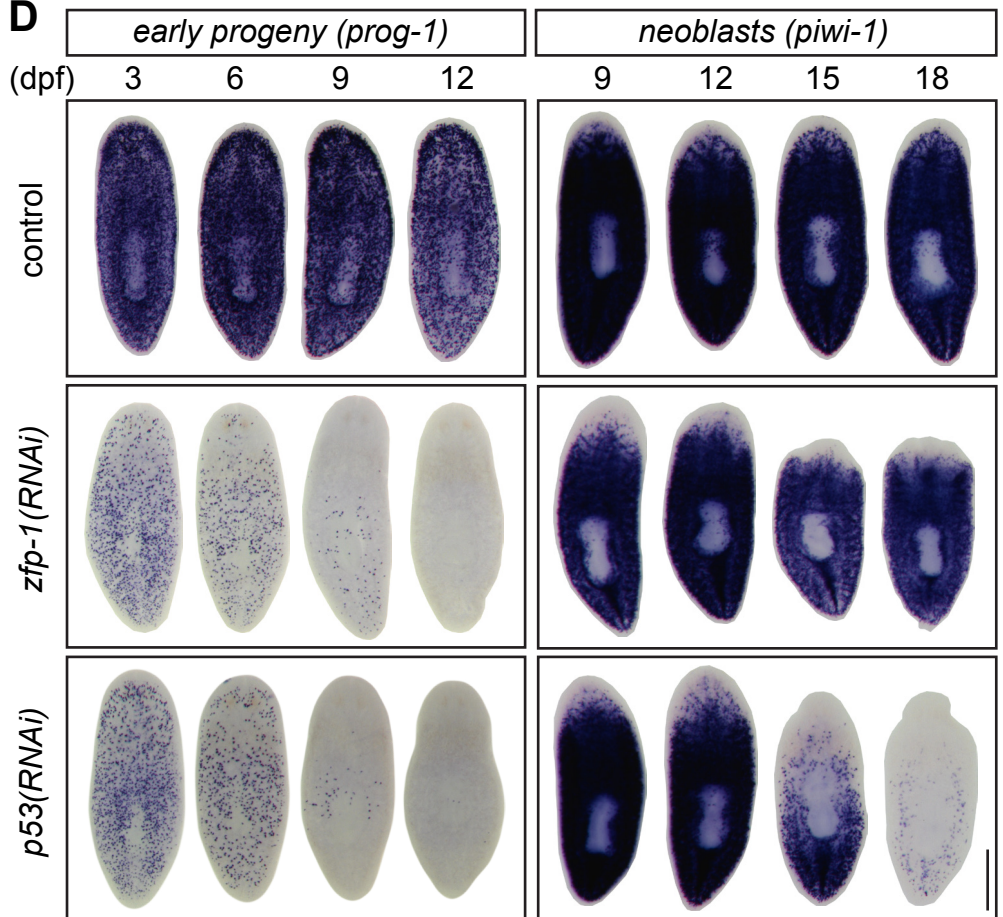

**E**

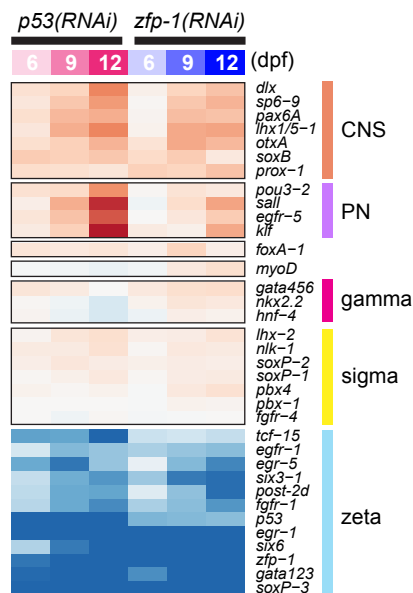

**F**

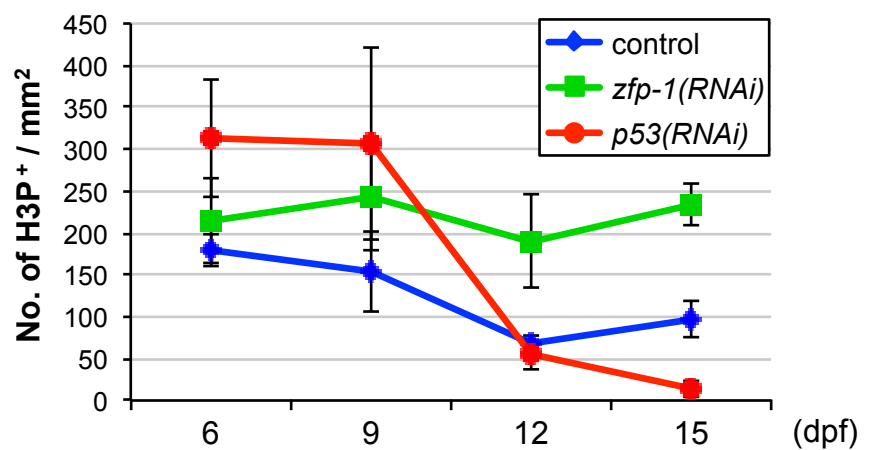

Supplement: NIHMS906402-supplement-1.pdf [file NIHMS906402-supplement-1.pdf]

Figure 6 - S2

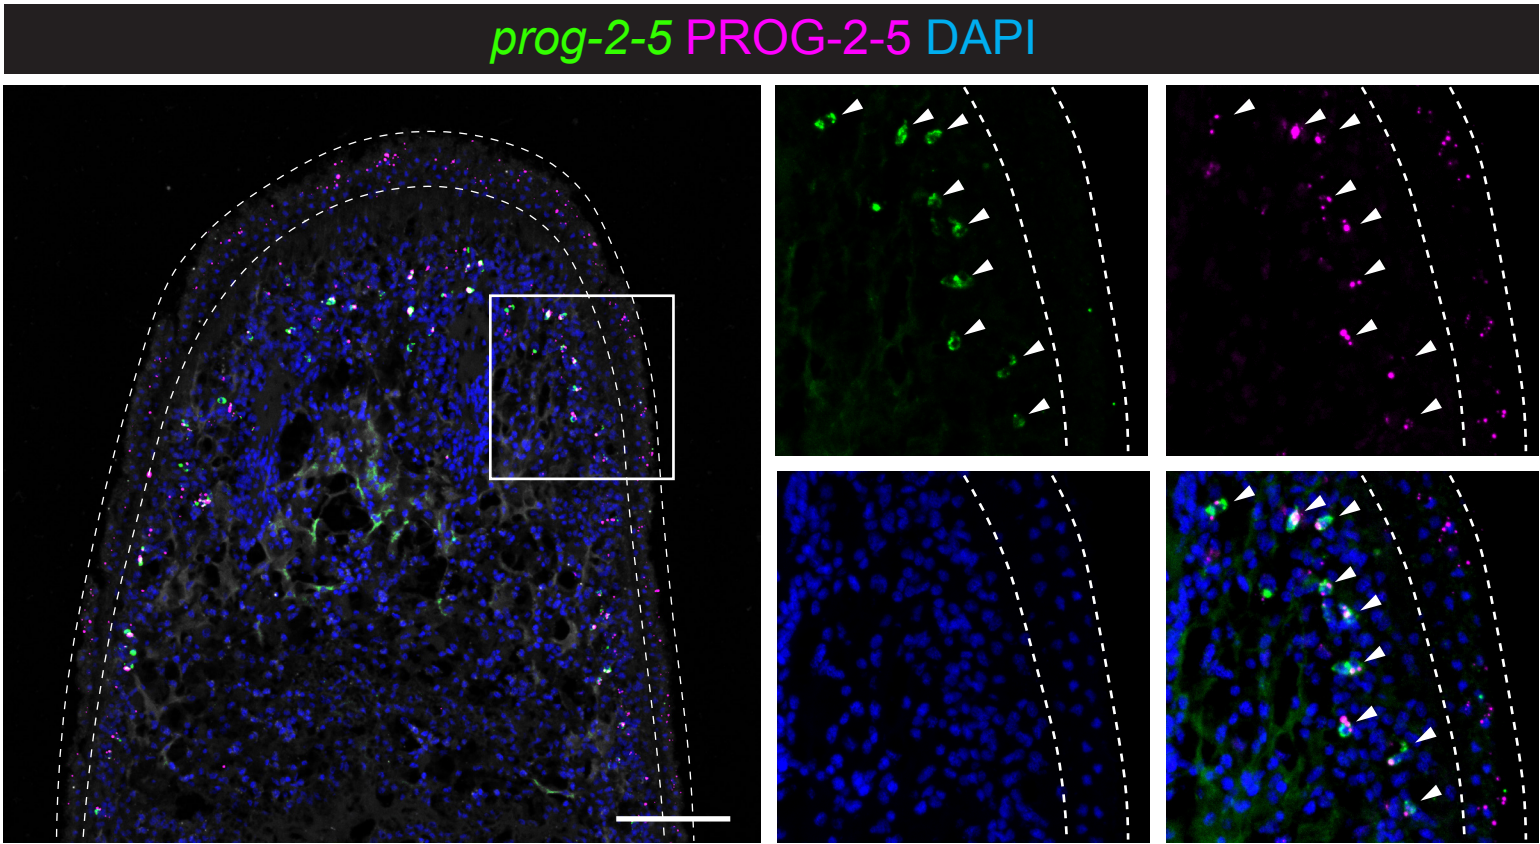

Supplement: NIHMS906402-supplement-10.pdf [file NIHMS906402-supplement-10.pdf]

Figure 6 - S3

A

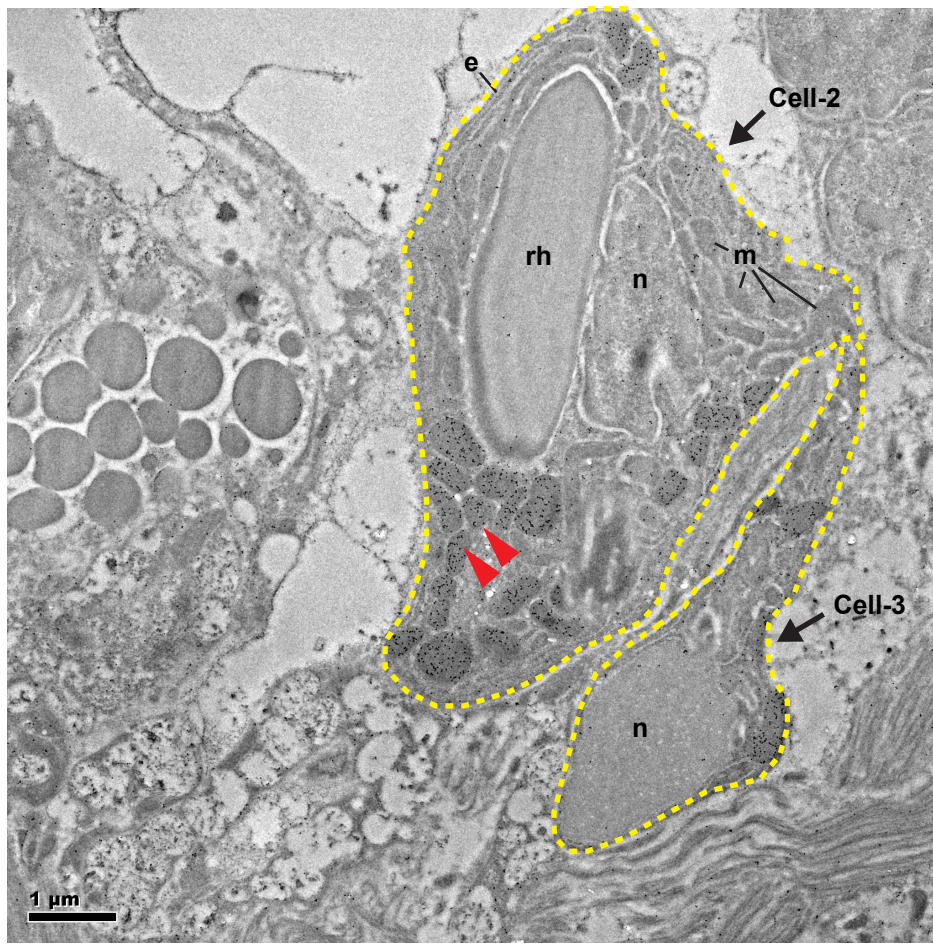

B

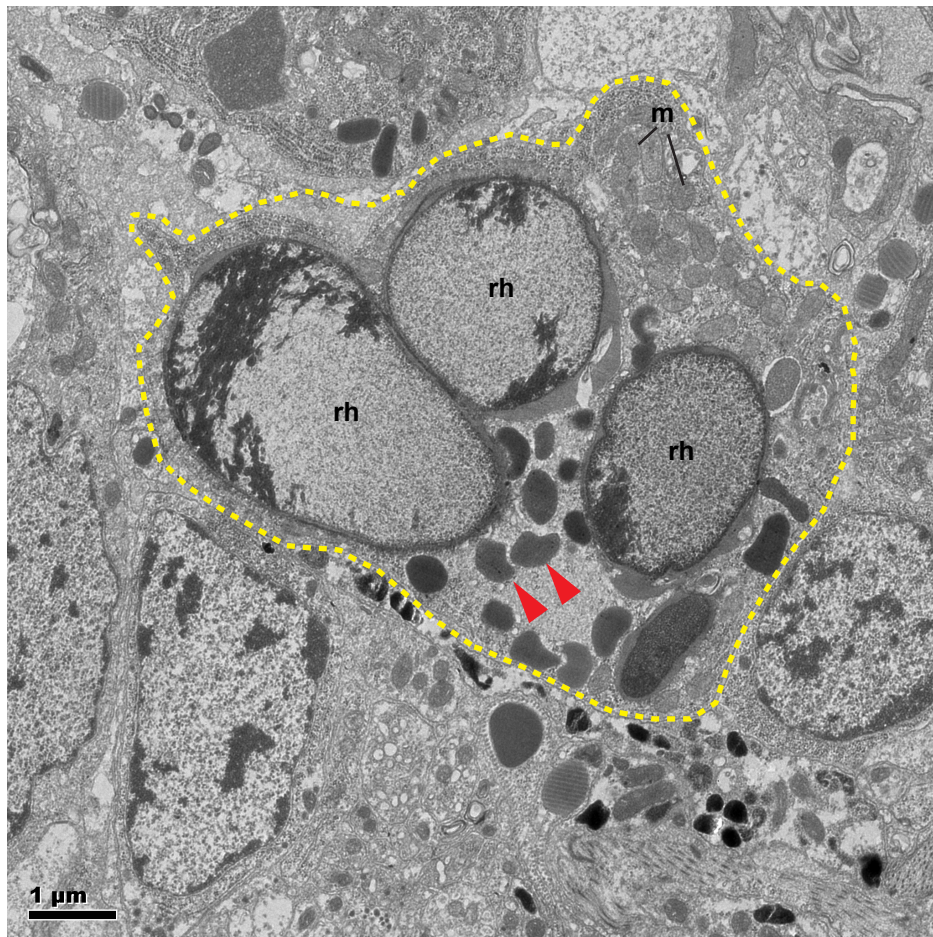

Supplement: NIHMS906402-supplement-11.pdf [file NIHMS906402-supplement-11.pdf]

Figure 1 - S2

FC  $\log_2(\text{irr}/\text{wt})$

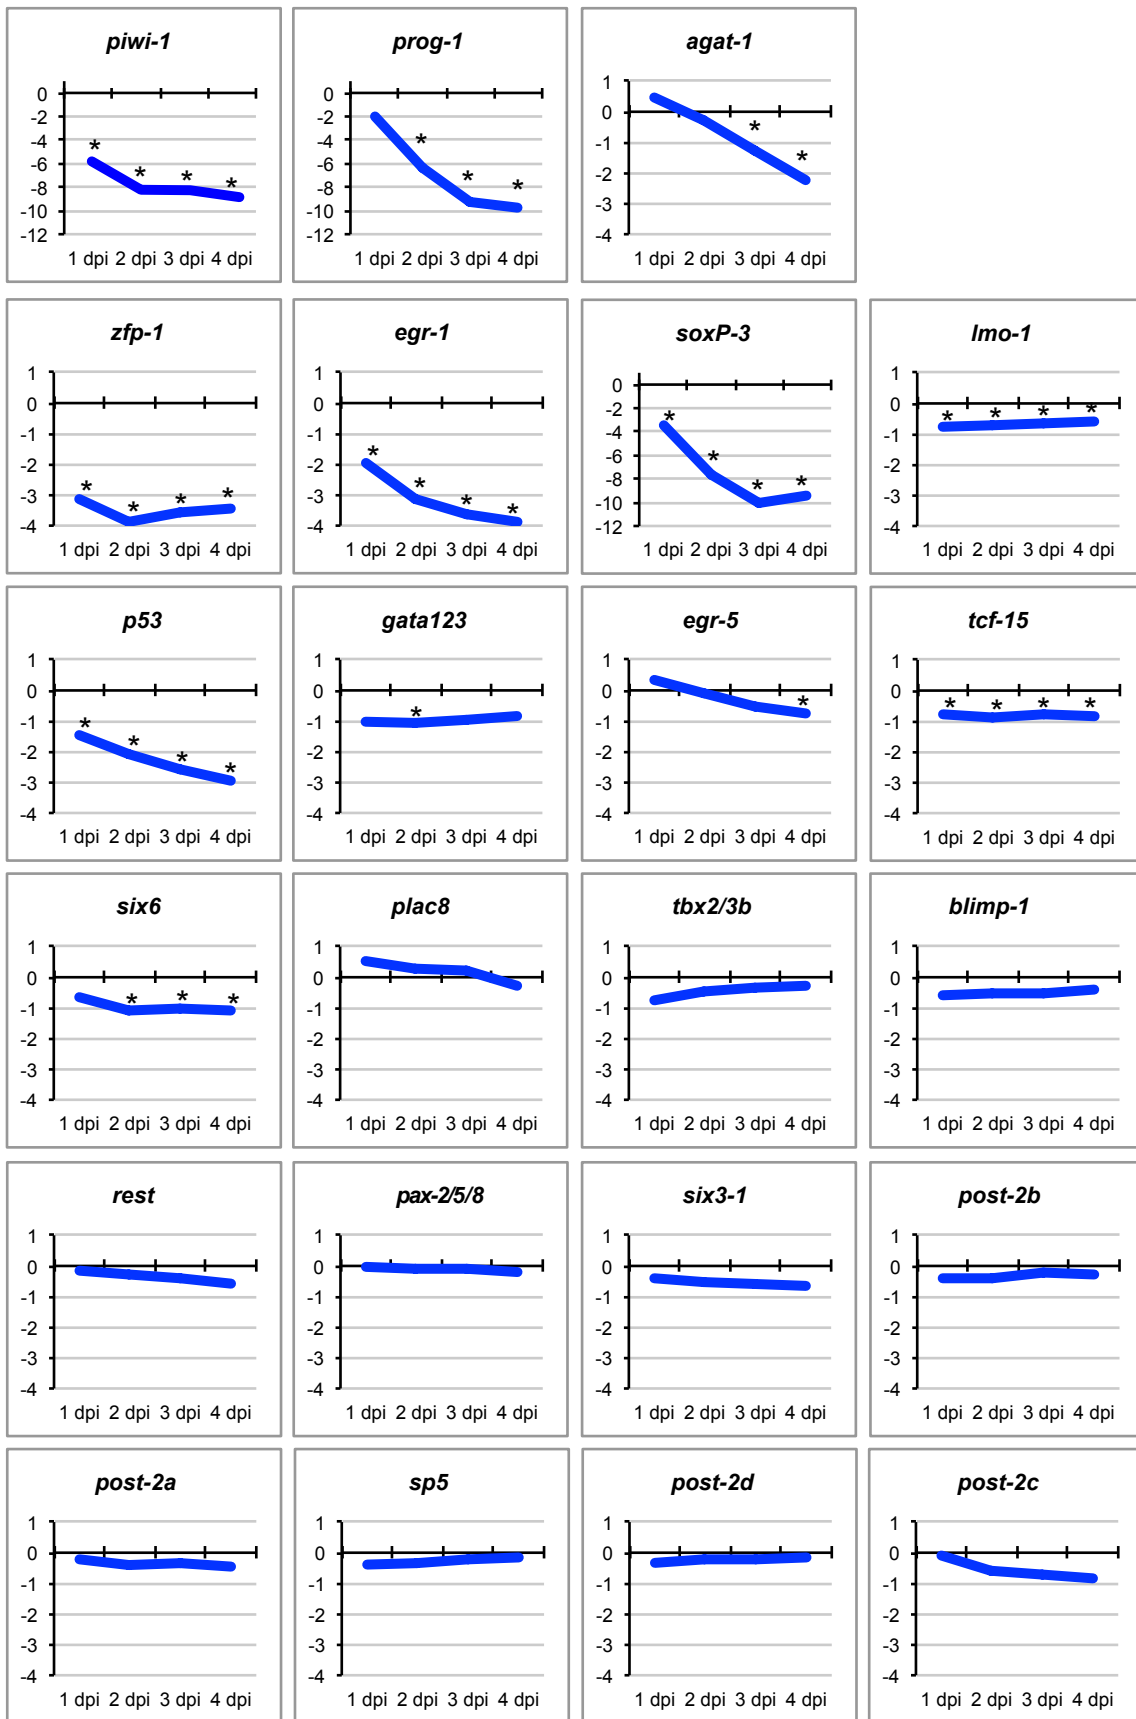

Supplement: NIHMS906402-supplement-2.pdf [file NIHMS906402-supplement-2.pdf]

Figure 2 - S1

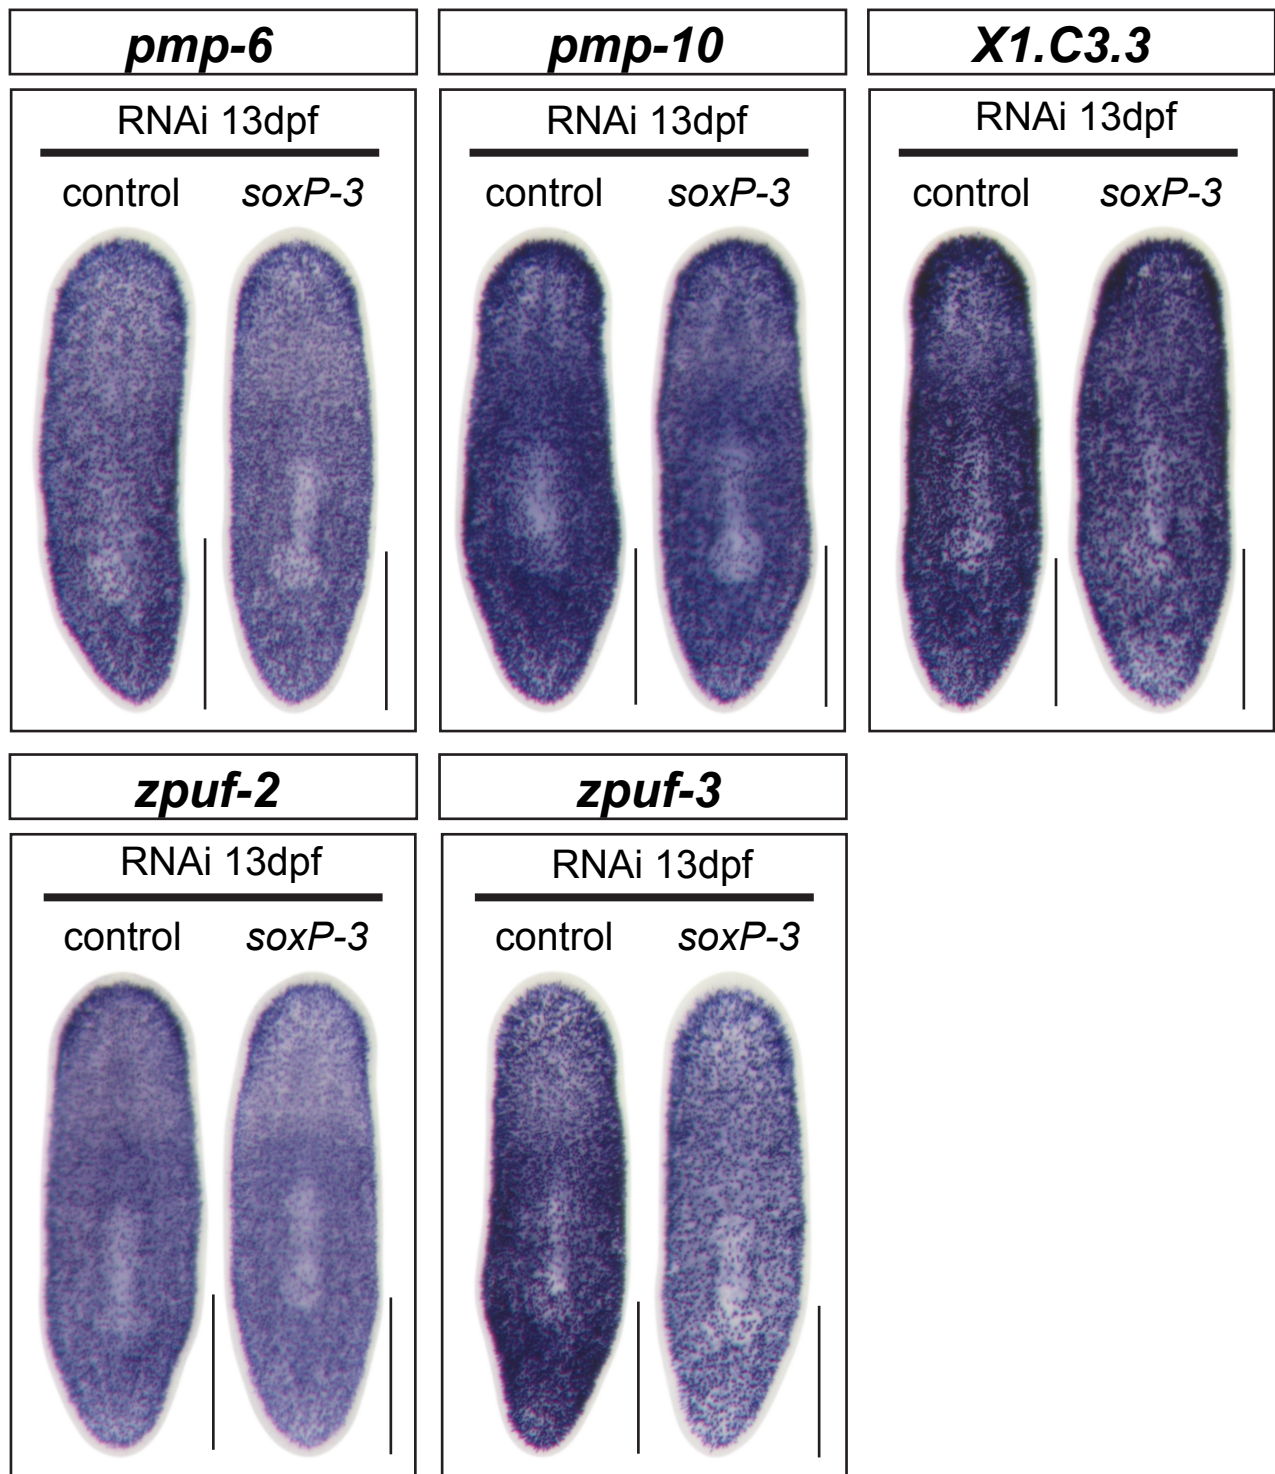

Supplement: NIHMS906402-supplement-3.pdf [file NIHMS906402-supplement-3.pdf]

Fig. 3 - S1

**A**

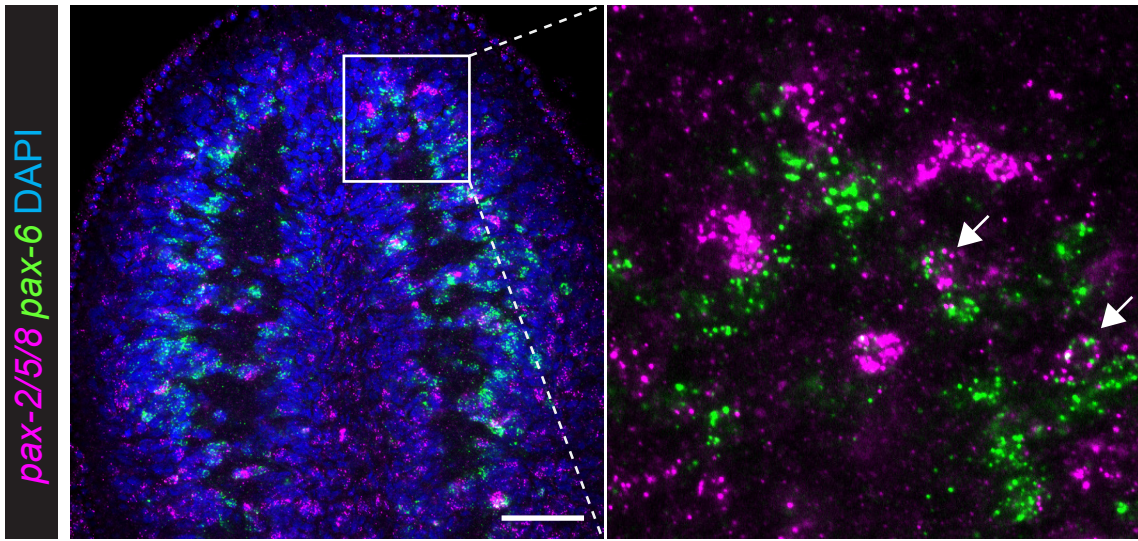

**B**

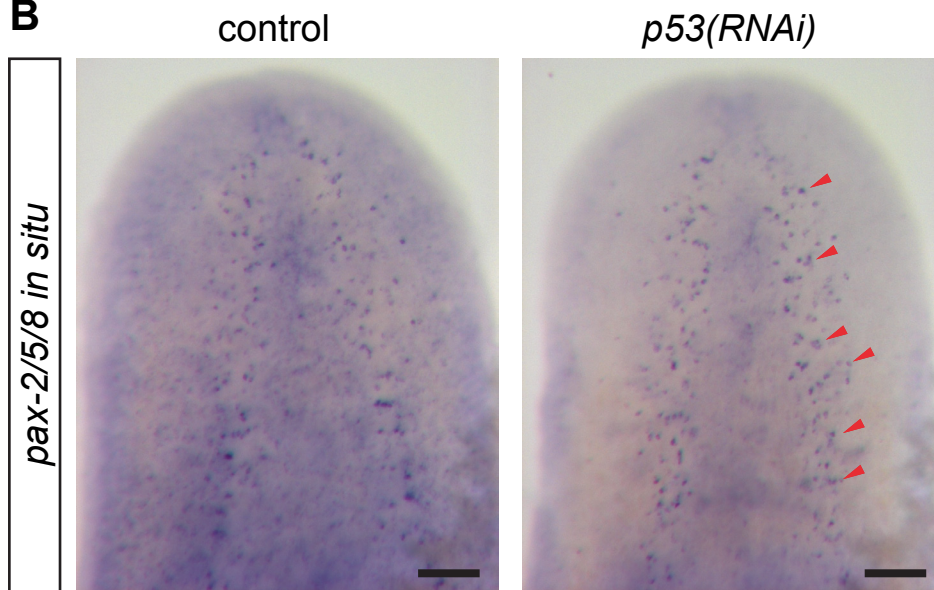

Supplement: NIHMS906402-supplement-4.pdf [file NIHMS906402-supplement-4.pdf]

Fig. 3 - S2

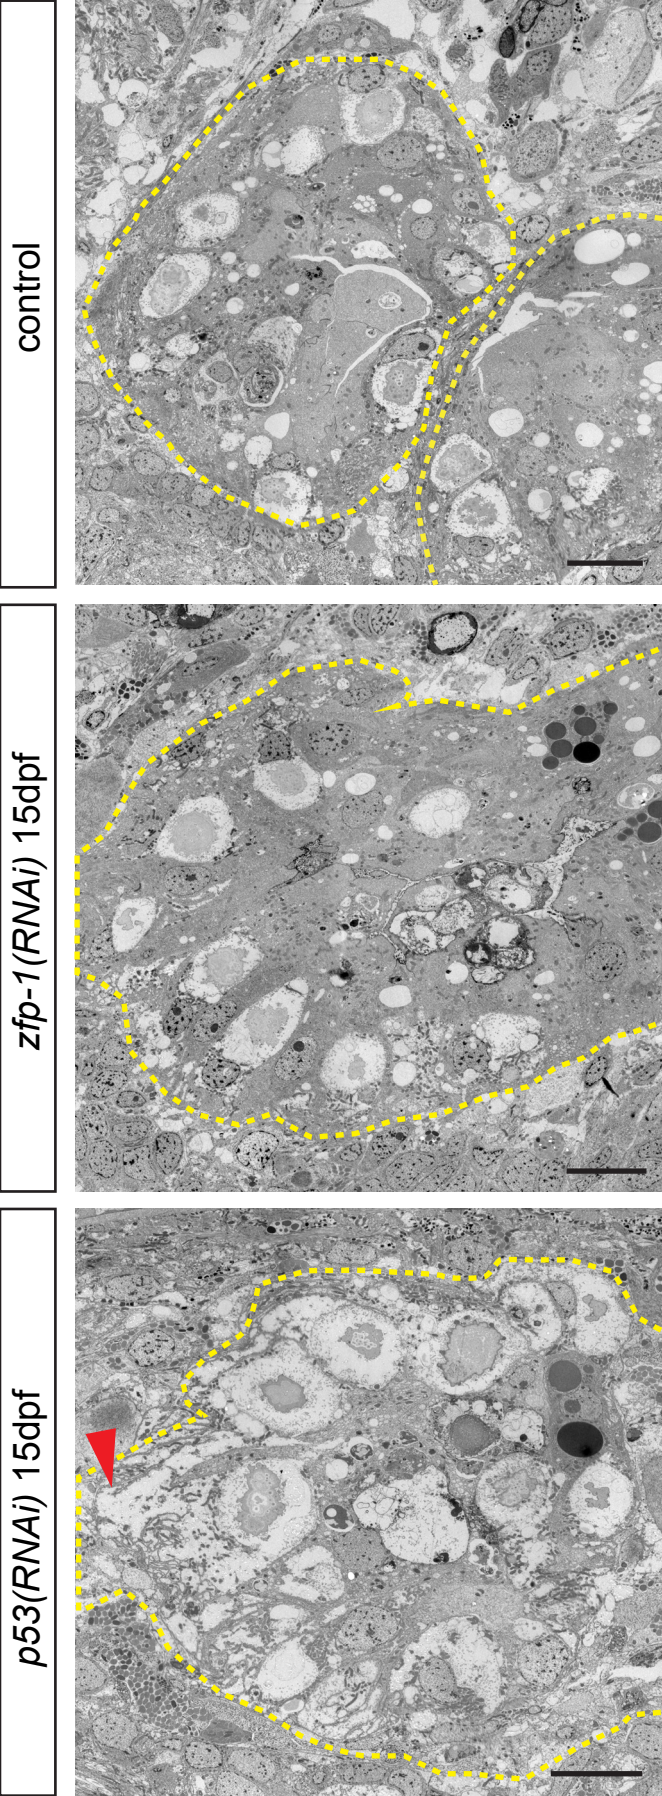

Supplement: NIHMS906402-supplement-5.pdf [file NIHMS906402-supplement-5.pdf]

Figure 5 - S1

**A**

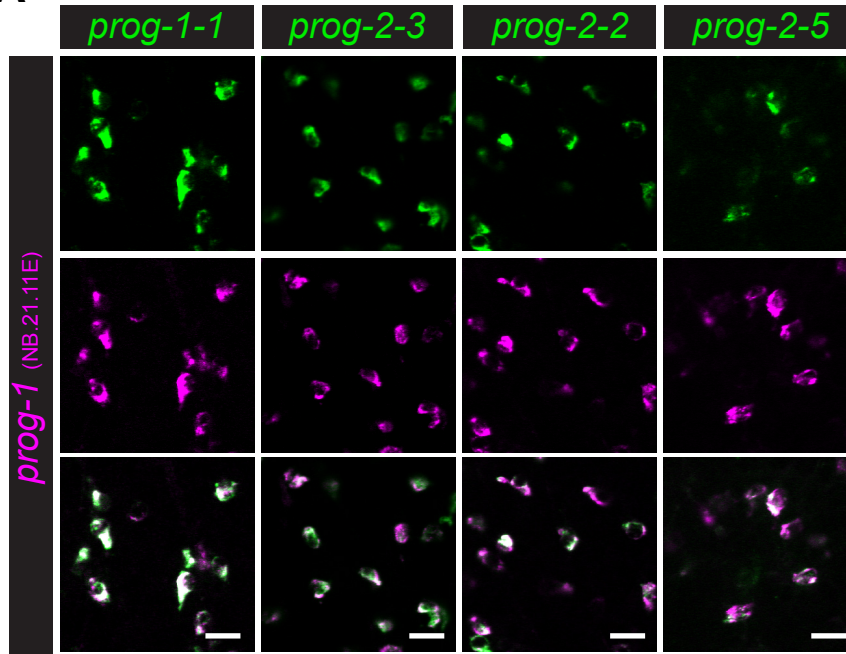

**B**

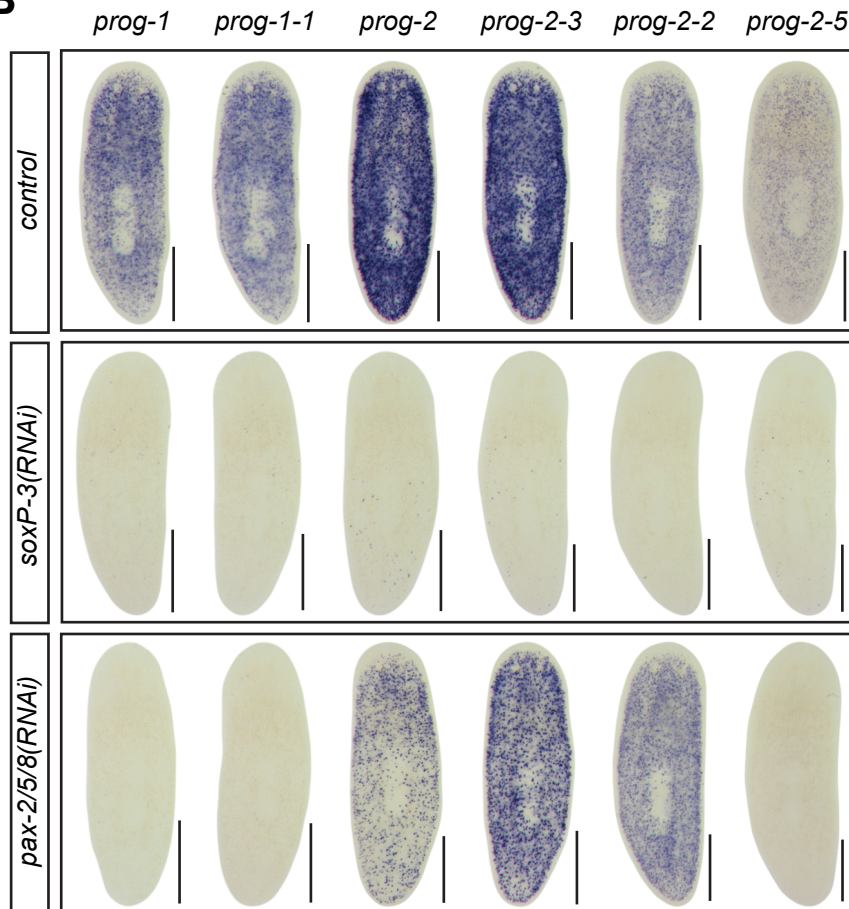

Supplement: NIHMS906402-supplement-7.pdf [file NIHMS906402-supplement-7.pdf]

Figure 5 - S2

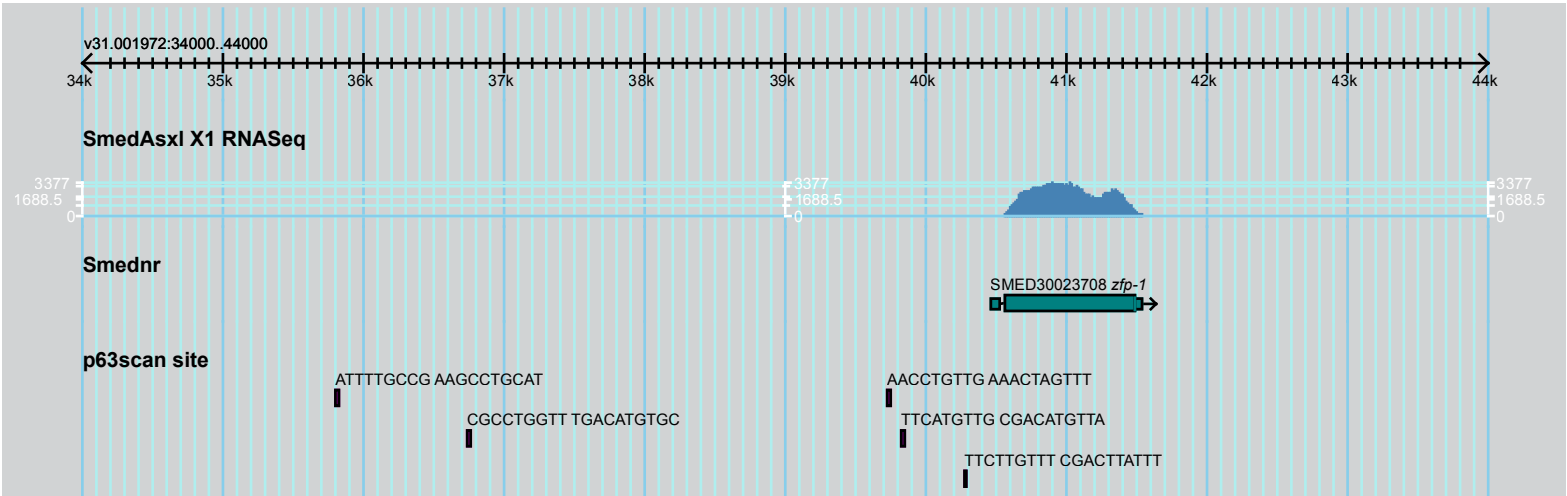

Supplement: NIHMS906402-supplement-8.pdf [file NIHMS906402-supplement-8.pdf]

**Figure 6 - S1**

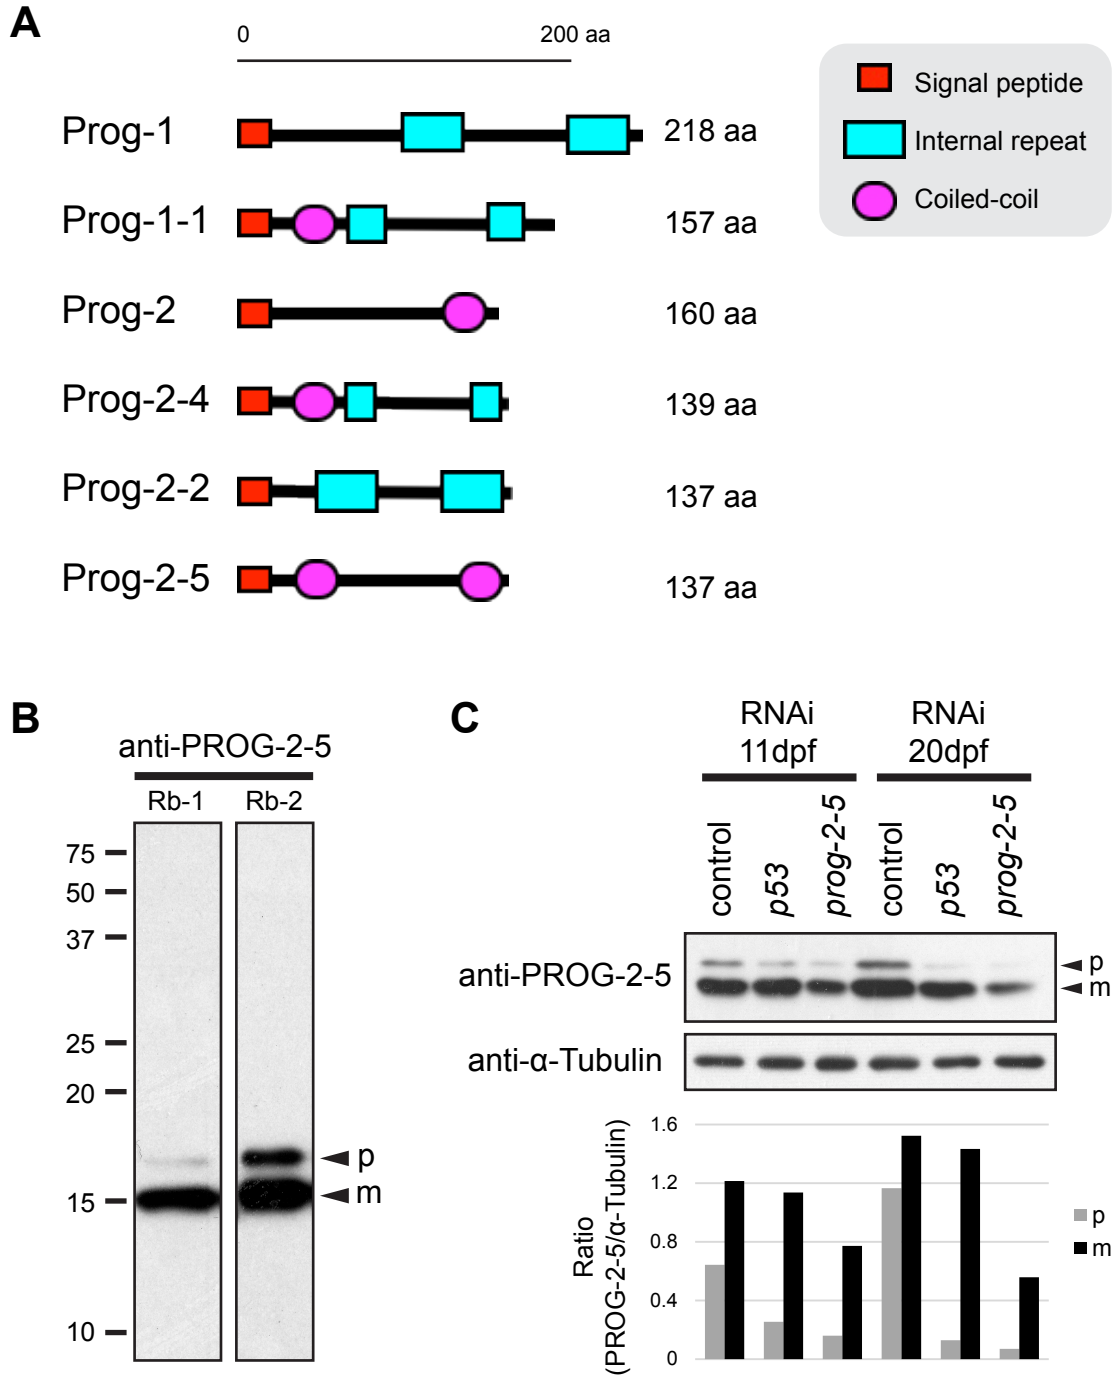

Supplement: NIHMS906402-supplement-9.pdf [file NIHMS906402-supplement-9.pdf]
